# Supplementary material
Source: Springer Nature journal article supplement (https://www.springermedizin.de/resource/supplementary/12943_2007_340_MOESM4_ESM.pdf/9553982)

A.

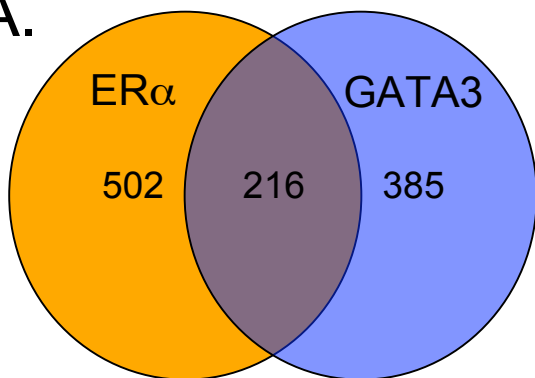

Cutoff = 14% (3 studies)

B.

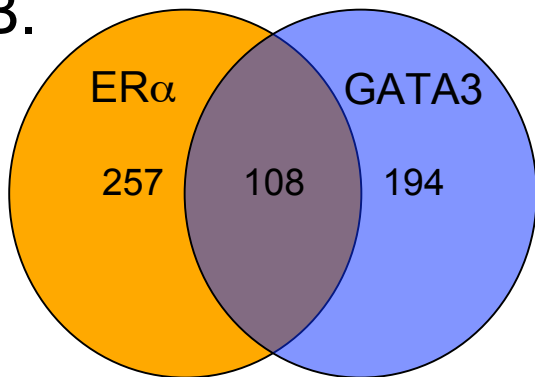

Cutoff = 19% (4 studies)

Supplement: MOESM4 [file 9553982]
